# Supplementary material for: Virus Nanoparticles Mediated Osteogenic Differentiation of Bone Derived Mesenchymal Stem Cells
Source: PubMed Central journal article supplement (PMC5115314; doi:10.1002/advs.201500026), 2015-06-25
Supplement: ADVS-2-0q-s001.pdf [file ADVS-2-0q-s001.pdf]

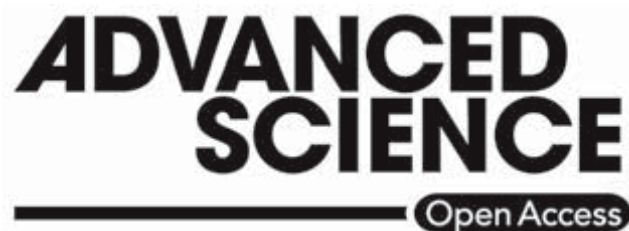

## Supporting Information

for *Adv. Sci.*, DOI: 10.1002/advs.201500026

Virus Nanoparticles Mediated Osteogenic Differentiation of  
Bone Derived Mesenchymal Stem Cells

*Kamolrat Metavarayuth, Pongkwan Sitasuwan, Jittima Amie  
Luckanagul, Sheng Feng, and Qian Wang\**

## Supporting Information

### Virus nanoparticles mediated osteogenic differentiation of bone derived mesenchymal stem cells

Kamolrat Metavarayuth, Pongkwan Sitasuwan, Jittima Amie Luckanagul, Sheng Feng, Qian

Wang\*

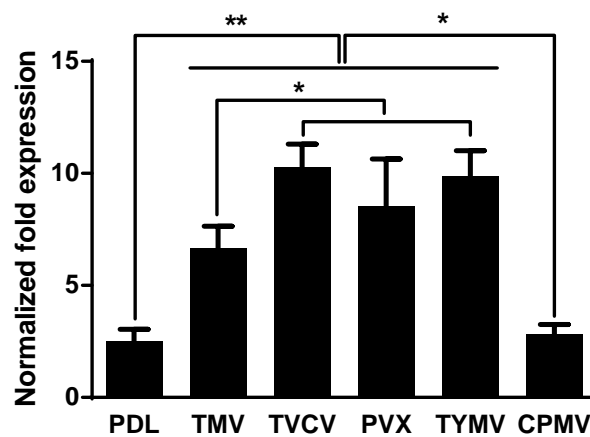

**Figure S1.** RT-qPCR analysis showed significant BMP2 upregulation in cells grown on TMV, TVCV, PVX, and TYMV coated substrates.

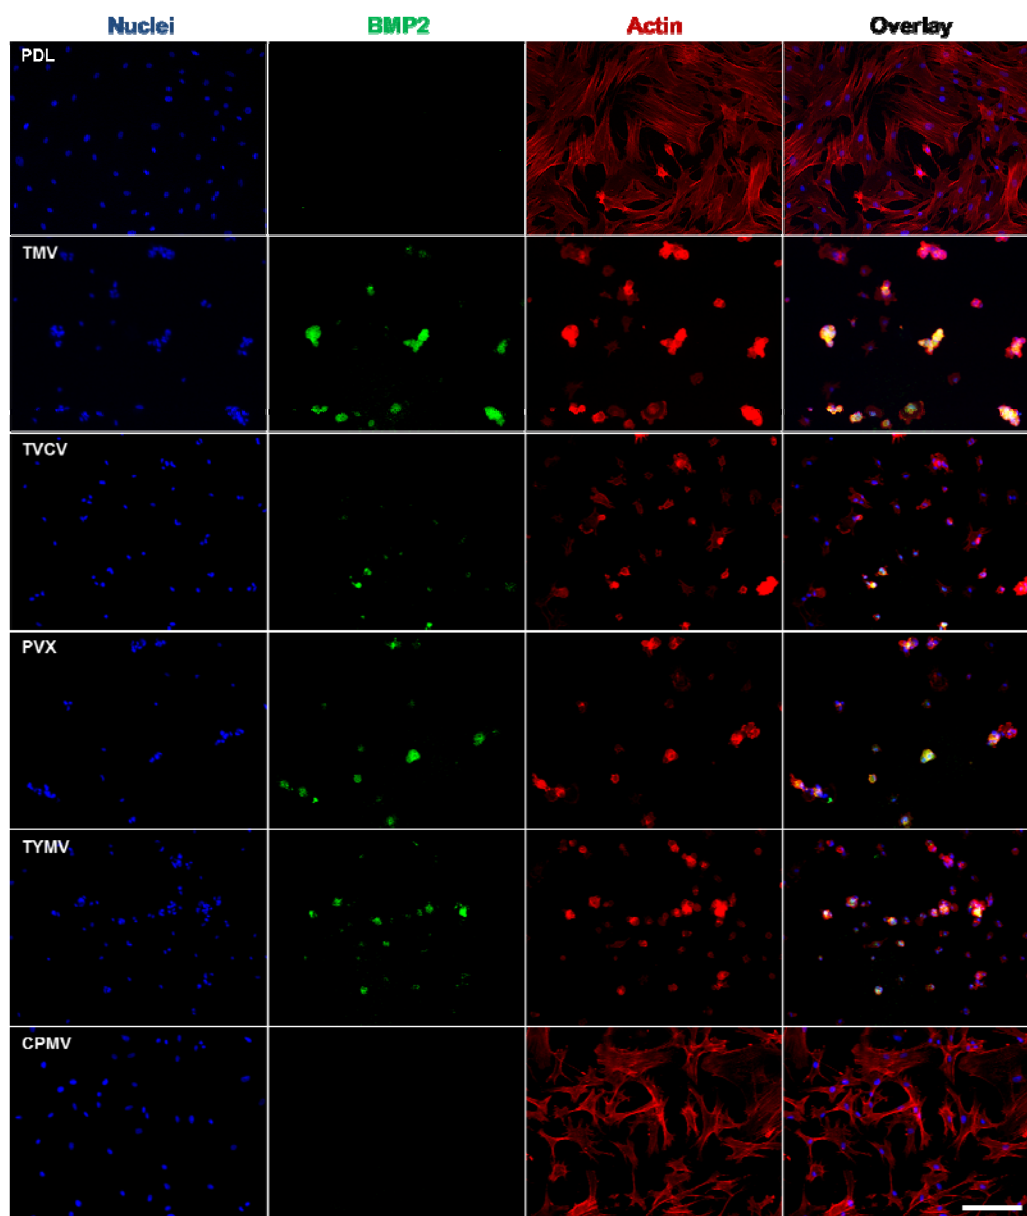

**Figure S2.** BMP2 immunohistochemical staining suggests the protein expressions are localized to the cell aggregates; most are found on TMV, TVCV, PVX, and TYMV substrates. Scale bar is 200  $\mu\text{m}$ . Color representation: nucleus (blue), BMP2 (green), actin (red).

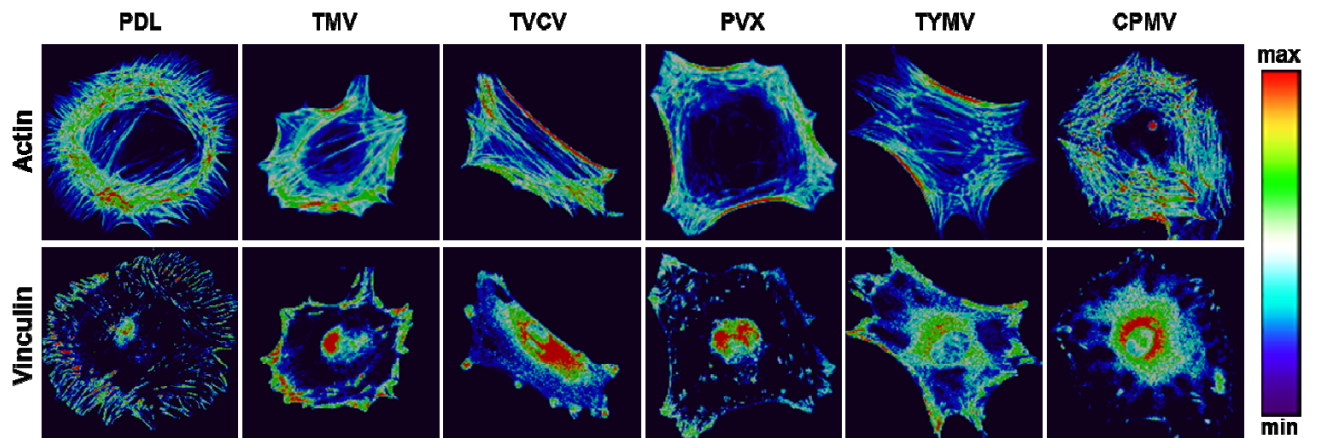

**Figure S3.** Representative actin (top panel) and vinculin (bottom panel) immunofluorescent heat maps of cells culture on PDL and virus coated substrates.

**Table S1.** Primers used for RT-qPCR to measure gene expression levels. BGLAP: bone-gamma-carboxyglutamate protein; BMP2: bone morphogenetic protein 2; SPP1: secreted phosphoprotein. 1

| Gene  | Sequence (5'-3')                     |
|-------|--------------------------------------|
| BGLAP | Forward: AAAGCCCAGCGACTCT            |
|       | Reverse: CTAAACGGTGGTGCCATAGAT       |
| BMP2  | Forward: ACCAACCATGGGTTTGTGGTGAAGT   |
|       | Reverse: TCCGCTGTTTGTGTTTGGCTTGACG   |
| GAPDH | Forward: ACTAAAGGGCATCCTGGGCTACACTGA |
|       | Reverse: TGGGTGGTCCAGGGTTTCTTACTCCTT |
| SPP1  | Forward: GACGGCCGAGGTGATAGCTT        |
|       | Reverse: CATGGCTGGTCTTCCCGTTGC       |
